# Supplementary material for: Theoretical Analysis for Using Pulsed Heating Power in Magnetic Hyperthermia Therapy of Breast Cancer
Source: MDPI journal article supplement (doi:10.3390/ijms22168895), 2021-08-18
Supplement: s1 [file s1]

# Theoretical Analysis for Using Pulsed Heating Power in Magnetic Hyperthermia Therapy of Breast Cancer

Thanh-Luu Cao<sup>1</sup>, Tuan-Anh Le<sup>1,2</sup>, Yaser Hadadian<sup>1</sup> and Jungwon Yoon<sup>1\*</sup>

<sup>1</sup>Gwangju Institute of Science and Technology, School of Integrated Technology, 123 Cheomdangwagi-ro, Buk-gu, Gwangju 61005, Korea; caothanhluu1988@gm.gist.ac.kr (T.L.C.); yaser.hadadian@gmail.com (Y.H.)

<sup>2</sup>Thuyloi University, 175 Tay Son, Dong Da, Ha Noi, Viet Nam. (e-mail: tuananhle@gm.gist.ac.kr or letuananh@tlu.edu.vn (T.A.L.))

\*Correspondence: jyoong@gist.ac.kr; Tel.: +82-62-715-5332

**Table S1.** Fraction of tissues damage at tumor domain at various source diameters for the pulsed and continuous powers for 30-minute simulation.

| duty | Cycle<br>(second) | Source diameter (mm) |                |                |                |                |               |
|------|-------------------|----------------------|----------------|----------------|----------------|----------------|---------------|
|      |                   | 1.5                  | 2              | 3              | 4              | 5              | 6             |
| 0.9  | 5                 | 0.93525              | 0.95048        | 0.9636         | 0.97737        | 0.93534        | 0.92093       |
|      | 10                | 0.93532              | 0.95027        | 0.96355        | 0.97731        | 0.93524        | 0.921         |
|      | 15                | 0.9353               | 0.95026        | 0.96345        | 0.97726        | 0.93516        | 0.92092       |
|      | 20                | 0.93528              | 0.95025        | 0.96337        | 0.9772         | 0.93511        | 0.92083       |
|      | 25                | 0.93526              | 0.95021        | 0.96339        | 0.97714        | 0.93504        | 0.92076       |
|      | 30                | 0.93533              | 0.95022        | 0.96335        | 0.97713        | 0.93498        | 0.92071       |
|      | 35                | 0.93532              | 0.95023        | 0.9633         | 0.97713        | 0.93494        | 0.92065       |
|      | 40                | 0.93537              | 0.95021        | 0.96329        | 0.97715        | 0.93489        | 0.92063       |
|      | 45                | 0.93539              | 0.9502         | 0.9632         | 0.97715        | 0.93489        | 0.92067       |
|      | 50                | 0.93518              | 0.95021        | 0.9633         | 0.97713        | 0.93484        | 0.92062       |
|      | 55                | 0.93529              | 0.95026        | 0.96338        | 0.97711        | 0.93494        | 0.92055       |
|      | 60                | 0.93554              | 0.9503         | 0.9632         | 0.97708        | 0.93502        | 0.92044       |
|      | 65                | 0.93527              | 0.95018        | 0.96316        | 0.97702        | 0.93498        | 0.92042       |
|      | 70                | 0.93535              | 0.94992        | 0.96315        | 0.97696        | 0.93486        | 0.92027       |
|      | 75                | 0.93525              | 0.95008        | 0.96311        | 0.97694        | 0.9347         | 0.92036       |
|      | 80                | 0.93497              | 0.94981        | 0.96312        | 0.97685        | 0.93471        | 0.92031       |
|      | 85                | 0.9346               | 0.94961        | 0.96293        | 0.97675        | 0.93444        | 0.92024       |
|      | 90                | 0.93489              | 0.94959        | 0.9627         | 0.97655        | 0.93389        | 0.91994       |
| 1.0  | 95                | 0.93453              | 0.94935        | 0.96257        | 0.97635        | 0.93362        | 0.91917       |
|      | 100               | <b>0.98687</b>       | <b>0.99241</b> | <b>0.99607</b> | <b>0.99864</b> | <b>0.98692</b> | <b>0.9808</b> |

**Table S2.** Fraction of tissues damage at tumor neighboring domain at various source diameters for the pulsed and continuous powers for 30-minute simulation.

| duty | Cycle<br>(second) | Source diameter (mm) |                |                |                |                |                |
|------|-------------------|----------------------|----------------|----------------|----------------|----------------|----------------|
|      |                   | 1.5                  | 2              | 3              | 4              | 5              | 6              |
| 0.9  | 5                 | 0.07503              | 0.085395       | 0.097147       | 0.11444        | 0.076115       | 0.068896       |
|      | 10                | 0.07509              | 0.085246       | 0.097136       | 0.11438        | 0.076076       | 0.068956       |
|      | 15                | 0.075094             | 0.085271       | 0.097085       | 0.11439        | 0.076064       | 0.068948       |
|      | 20                | 0.075119             | 0.085285       | 0.096976       | 0.11437        | 0.076073       | 0.068937       |
|      | 25                | 0.075136             | 0.085304       | 0.097073       | 0.11436        | 0.076074       | 0.068937       |
|      | 30                | 0.075175             | 0.085328       | 0.097083       | 0.11437        | 0.076083       | 0.068952       |
|      | 35                | 0.07521              | 0.085345       | 0.097065       | 0.1144         | 0.076089       | 0.068945       |
|      | 40                | 0.075227             | 0.085379       | 0.097067       | 0.11443        | 0.076111       | 0.068987       |
|      | 45                | 0.075259             | 0.085387       | 0.097          | 0.1145         | 0.076154       | 0.069041       |
|      | 50                | 0.075181             | 0.085432       | 0.097176       | 0.11451        | 0.076165       | 0.069059       |
|      | 55                | 0.075309             | 0.08547        | 0.097271       | 0.11459        | 0.076269       | 0.069061       |
|      | 60                | 0.075351             | 0.085538       | 0.097155       | 0.11459        | 0.076287       | 0.069086       |
|      | 65                | 0.075398             | 0.085546       | 0.097164       | 0.11462        | 0.076289       | 0.069143       |
|      | 70                | 0.075402             | 0.085537       | 0.09724        | 0.11459        | 0.076338       | 0.069175       |
|      | 75                | 0.075318             | 0.085588       | 0.097298       | 0.11465        | 0.076294       | 0.069224       |
|      | 80                | 0.075186             | 0.085721       | 0.097355       | 0.11464        | 0.076364       | 0.069251       |
|      | 85                | 0.075097             | 0.085757       | 0.097265       | 0.11461        | 0.076362       | 0.069257       |
|      | 90                | 0.075511             | 0.085763       | 0.097335       | 0.11462        | 0.076296       | 0.069203       |
|      | 95                | 0.075426             | 0.085658       | 0.097382       | 0.1147         | 0.076306       | 0.069135       |
| 1.0  | 100               | <b>0.13322</b>       | <b>0.14981</b> | <b>0.16778</b> | <b>0.19286</b> | <b>0.13445</b> | <b>0.12248</b> |
